# Supplementary material for: Investigating Distinct Skin Microbial Communities and Skin Metabolome Profiles in Atopic Dermatitis
Source: MDPI journal article supplement (doi:10.3390/ijms25105211), 2024-05-10
Supplement: s1 [file s1]

**Table S1.** Demographic and clinical characteristics.

|                     | AD<br>(n = 7)    | Healthy control<br>(n = 7) | P-value        |        |
|---------------------|------------------|----------------------------|----------------|--------|
| Age                 | 28.29 ± 7.41     | 29.57 ± 2.82               | 0.68           |        |
| Sex                 |                  |                            | 1.00           |        |
| Male                | 5 (71.42)        | 5 (71.42)                  |                |        |
| Female              | 2 (28.58)        | 2 (28.58)                  |                |        |
| BMI (kg/m²)         | 26.06 ± 2.05     | 22.95 ± 1.17               | 0.21           |        |
| EASI                | 24.31 ± 3.91     | 0                          | <0.001         |        |
| Eosinophil (%)      | 6.74 ± 1.48      | 1.02 ± 0.15                | 0.008          |        |
| Total IgE           | 1246.57 ± 350.29 | 33.14 ± 6.47               | 0.013          |        |
|                     | Lesional skin    | Non-lesional skin          |                |        |
| TEWL                | 32.14 ± 2.88     | 19.31 ± 3.62               | 12.22 ± 2.54   | <0.001 |
| Erythema index (AU) | 396.66 ± 54.57   | 229.33 ± 44.09             | 183.95 ± 28.92 | 0.007  |
| pH                  | 5.72 ± 0.26      | 5.45 ± 1.99                | 5.32 ± 0.10    | 0.359  |

Data are expressed as the mean ± standard deviation or number (percentage).  
Abbreviations: AD, atopic dermatitis; AU, arbitrary unit; EASI, eczema area severity index; HC, healthy control; IGA, investigators global assessment; NRS, numerical rating scale.

**Table S2.** Summary of total read counts for sequence reads.

| Group/Sample No. | Total read count |
|------------------|------------------|
| AD-L-2-S001      | 179,624          |
| AD-L-7-S001      | 147,778          |
| AD-L-6-S001      | 214,274          |
| AD-L-9-S001      | 174,120          |
| AD-L-10-S001     | 160,274          |
| AD-L-11-S001     | 179,486          |
| AD-L-14-S001     | 195,670          |
| AD-C-2-S001      | 206,386          |
| AD-C-6-S001      | 174,288          |
| AD-C-7-S001      | 157,710          |
| AD-C-9-S001      | 192,112          |
| AD-C-10-S001     | 205,328          |
| AD-C-11-S001     | 163,698          |
| AD-C-14-S001     | 171,130          |
| HC-C-1-S001      | 181,880          |
| HC-C-4-S001      | 164,308          |
| HC-C-5-S001      | 151,156          |
| HC-C-7-S001      | 160,524          |
| HC-C-8-S001      | 203,744          |
| HC-C-9-S001      | 185,980          |
| HC-C-10-S001     | 276,084          |
